# Supplementary material for: High Vimentin Expression Associated with Lymph Node Metastasis and Predicated a Poor Prognosis in Oral Squamous Cell Carcinoma
Source: PubMed Central journal article supplement (PMC5155220; doi:10.1038/srep38834), 2016-12-14
Supplement: srep38834-s1.pdf [file srep38834-s1.pdf]

## Supplementary Information

### High Vimentin Expression Correlated with Lymph Node Metastasis and Predicated a Poor Prognosis in Oral Squamous Cell Carcinoma

Shuli Liu<sup>1,2, #</sup>, Liu Liu<sup>1, 2, #</sup>, Weimin Ye<sup>1,2, #</sup>, Dongxia Ye<sup>1,2</sup>, Tong Wang<sup>3</sup>,  
Wenzheng Guo<sup>3</sup>, Yueling Liao<sup>3</sup>, Dongliang Xu<sup>3</sup>, Hongyong Song<sup>3</sup>, Ling Zhang<sup>1,2</sup>,  
Hanguang Zhu<sup>1,2</sup>, Jiong Deng<sup>3,4,5 \*</sup>, Zhiyuan Zhang<sup>1,2 \*</sup>

<sup>1</sup>Department of Oral and Maxillofacial–Head and Neck Oncology, Ninth People’s Hospital, Shanghai Jiao Tong University School of Medicine, Shanghai, China

<sup>2</sup>Shanghai Key Laboratory of Stomatology

<sup>3</sup>Key Laboratory of Cell Differentiation and Apoptosis of Chinese Minister of Education, Shanghai Jiao Tong University School of Medicine, Shanghai, China.

<sup>4</sup>Shanghai Key Laboratory for Tumor Microenvironment and Inflammation, Shanghai Jiao Tong University School of Medicine, Shanghai, China.

<sup>5</sup>Translation Medicine Center, Shanghai Chest Hospital, Shanghai Jiao Tong University, Shanghai, China

**\*Correspondence to:** Jiong Deng: [jjiongdeng@shsmu.edu.cn](mailto:jjiongdeng@shsmu.edu.cn)

Zhiyuan Zhang: [zhzhy@sjtu.edu.cn](mailto:zhzhy@sjtu.edu.cn)

**Fig. S1**

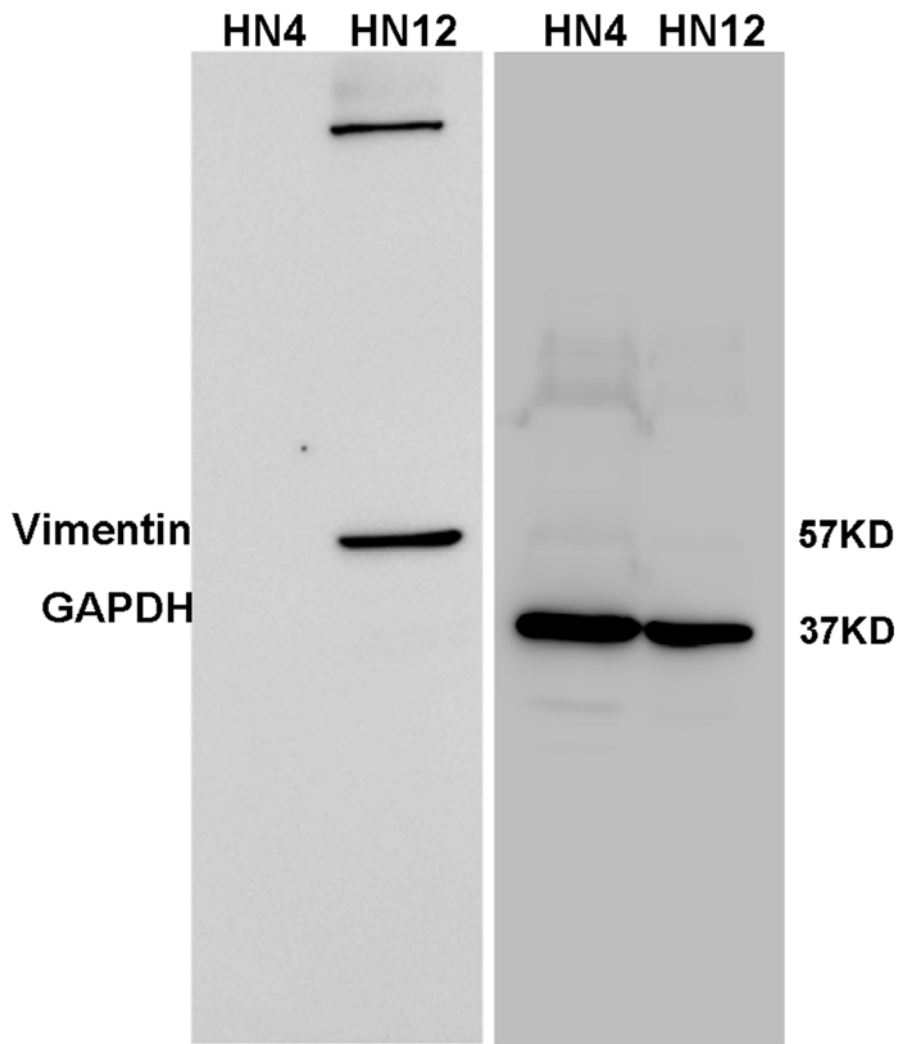

**Fig. S1** Westernblot analysis of vimentin protein levels in HN4 and HN12 cell lines.

**Fig. S2**

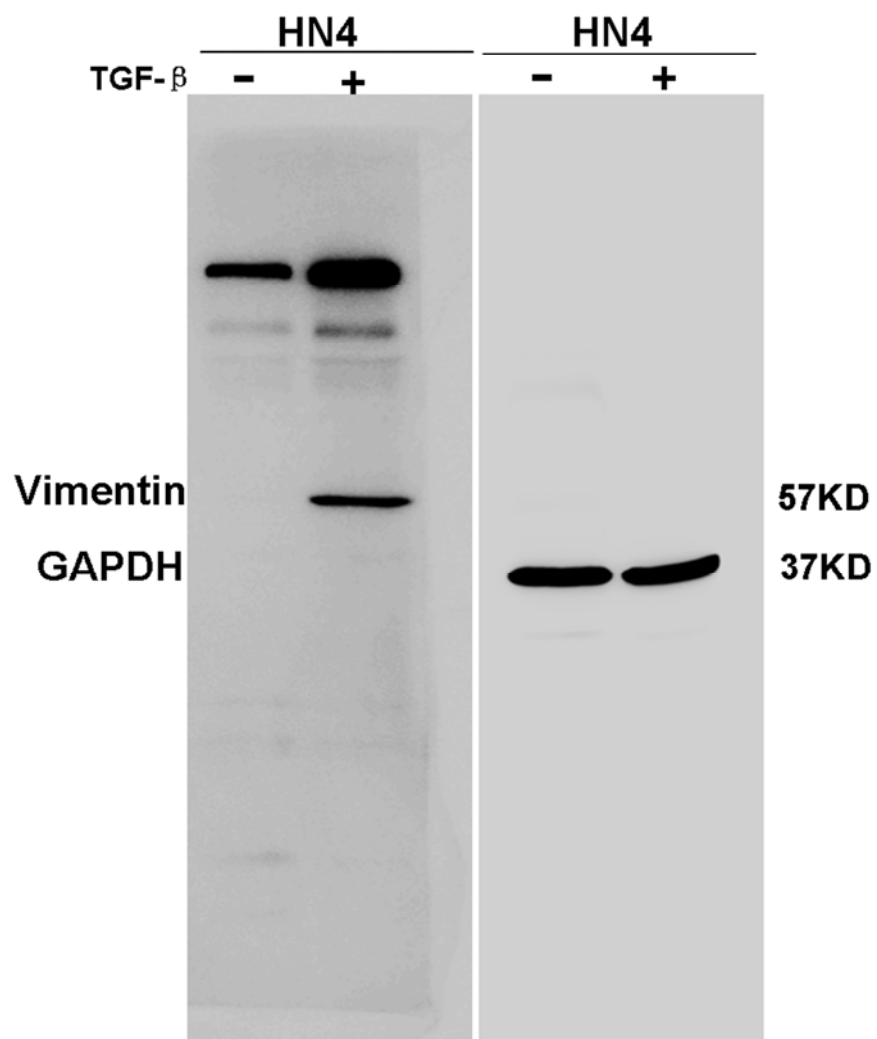

**Fig. S2** Western blot analysis of vimentin in HN4 cells treated with or without TGF- $\beta$ .

**Fig. S3**

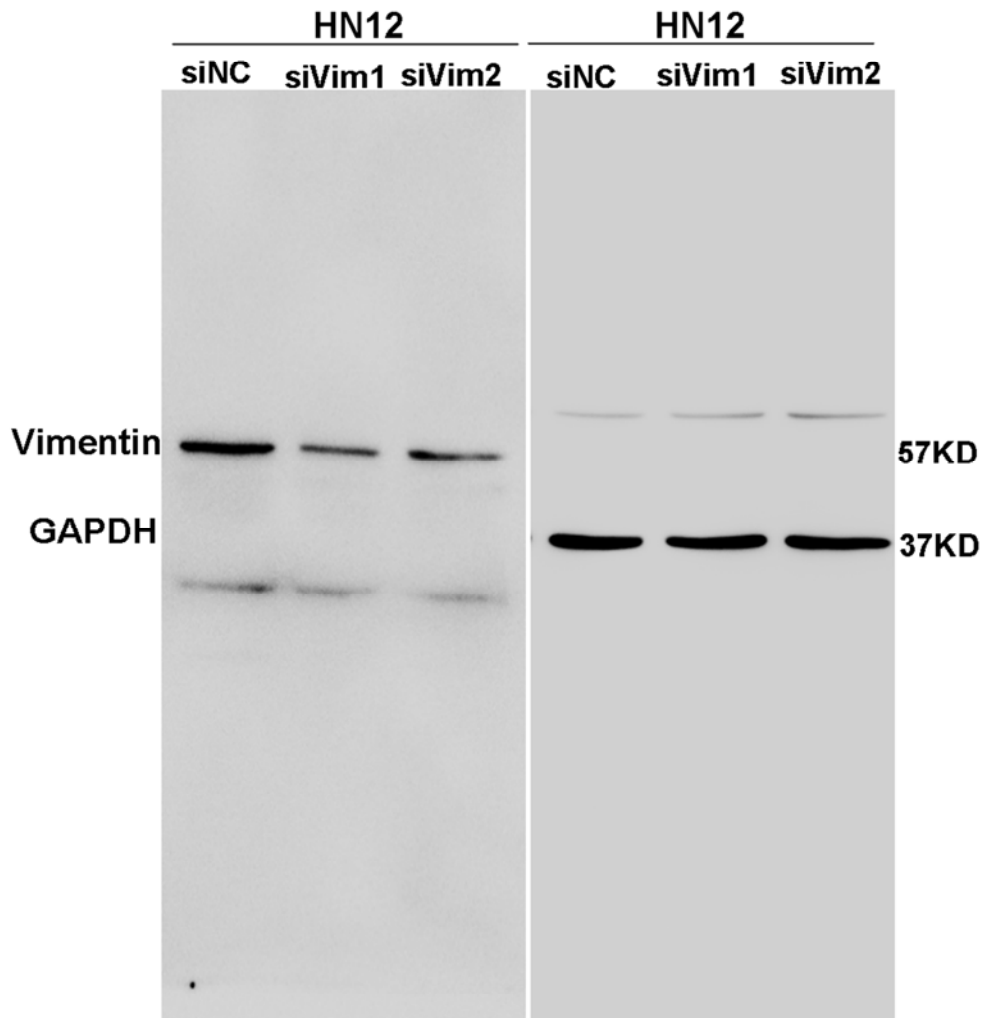

**Fig. S3** Western blot analysis of vimentin in transfected HN12 cells with knockdown of vimentin and control HN12 cells.
